# Supplementary material
Source: MDPI journal article supplement (https://www.mdpi.com/2071-1050/15/24/16854)
Supplement: s1 [file s1]

## Supplementary Materials File S3

**Table S2.** Cluster Dependency Labels in the 2000s.

| Cluster-ID | Tags                    | Top Terms (Latent Semantic Analysis)                                                                                                                                                                                    | Top Terms (Log-Likelihood Ratio)                                                                                                                       | Top Terms (Mutual Information)                                                                                |
|------------|-------------------------|-------------------------------------------------------------------------------------------------------------------------------------------------------------------------------------------------------------------------|--------------------------------------------------------------------------------------------------------------------------------------------------------|---------------------------------------------------------------------------------------------------------------|
| #0         | sustainable development | sustainable development; regional planning; urban governance; urban sustainability; new urbanism   urban planning; urban sustainability; urban intensification; sustainability policy; urban waterfronts                | <b>sustainable development</b> (17.16); gentrification (16.42); urban political ecology (16.42); Vancouver (10.93); building assessment system (10.93) | subjectivity; urban intensification; environmentalism; planning practice; Canada                              |
| #1         | landscape preferences   | urban ecology; landscape preferences; human well-being; habitat fragmentation; landscape indices   green space; restorative environments; noise annoyance; road traffic; urban sustainability                           | <b>landscape preferences</b> (9.25); restorative environments (9.25); sustainable cities (9.25); green space (7.22); urbanization (6.54)               | rainwater harvesting; food production; landscape professionals; invasiveness; urban soil quality              |
| #2         | physical activity       | physical activity; compact development; urban ecology; infrastructure planning; city planning   land use planning; environmental justice; basic amenities; extraterritorial jurisdiction; compact development           | <b>physical activity</b> (28.26); built environment (21.13); policy (10.29); environmental justice (10.29); public health (7.49)                       | land use united states; town and city planning; mass transit; features; infrastructure                        |
| #3         | ecology scenarios       | landscape ecology; ecosystem services; urban greenspace; urban greening; ecological planning   harmonious degree; developmental degree; complex urban ecosystem; recycling degree; dispersal patchmapper                | <b>scenarios</b> (9.71); harmonious degree (9.71); public lands (9.71); developmental degree (9.71); urbanization (5.81)                               | Barcelona; biodiversity indicators; balance of carbon-oxygen; land suitability indices; systemic approach     |
| #4         | landscape metrics       | urban ecology; landscape ecology; land-use patterns; ecosystem function; green space   landscape metrics; urban green spaces; moving window; gradient analysis; urban-rural gradients                                   | <b>landscape metrics</b> (5.72); urban spatial dynamics (4.83); interdisciplinary (4.83); ecosystem function (4.83); hydrology (4.83)                  | urban spatial dynamics; interdisciplinary; ecosystem function; hydrology; watershed                           |
| #5         | biotic homogenization   | urban ecology; urban planning; passer domesticus; Sturnus vulgaris; bird species richness   conservation planning; urban landscape; environmental legislation; edge effect; urban vegetation                            | <b>biotic homogenization</b> (8.32); isolation (8.32); urban flora (8.32); conservation planning (4.98); urban landscape (4.77)                        | habitat; passer domesticus; species extinction; habitat disturbance; rapid assessment                         |
| #6         | birds                   | indicator species; surrogate taxa; ecosystem management; life history; umbrella species   landscape pattern indices; land use change; habitat fragmentation; santa monica mountains; coastal sage scrub                 | <b>birds</b> (19.23); landscape (12.8); riparian forest (9.74); conservation (8.07); urban ecology (7.08)                                              | matrix; red-listed forest birds; great basin; threshold response; thresholds                                  |
| #7         | tree management         | urban forest; institutional forest; species diversity; park forest; roadside forest   tree management; livable city; greenspace planning; urban greenery; urban forestry                                                | <b>tree management</b> (16.24); urban tree (12.45); urban greening (10.76); urban forest (9.61); Guangzhou (8.74)                                      | urban trees; amenity vegetation; livable city; development history; urban soil                                |
| #8         | ecology vulnerability   | land-use change; information-driven economy; land-use pattern; industrial economy; primary productivity   conservation planning; biological invasions; spatial modeling; future land use changes; ecological mechanisms | <b>vulnerability</b> (12.83); simulation modeling (6.4); reserve selection (6.4); information-driven economy (6.4); future land use changes (6.4)      | simulation modeling; reserve selection; information-driven economy; future land use changes; spatial modeling |
| #9         | landscape fragmentation | sustainable development; time series; environmental indicators; effective mesh size; landscape fragmentation   urban sprawl;                                                                                            | <b>California</b> (9.92); time series (9.92); wildland-urban interface (8.53); agriculture (6.28); conservation subdivision (6.28)                     | landscape fragmentation; detection probabilities; spatial statistic; Mayacmas Mountains; traffic              |

|     |                                       |                                                                                                                                                                                                                                                                              |                                                                                                                                                         |                                                                                                              |
|-----|---------------------------------------|------------------------------------------------------------------------------------------------------------------------------------------------------------------------------------------------------------------------------------------------------------------------------|---------------------------------------------------------------------------------------------------------------------------------------------------------|--------------------------------------------------------------------------------------------------------------|
| #10 | <b>urbanization gradient</b>          | Russian river; ecological thresholds; exurban development; salmonid spawning habitat urban ecology; metro manila; urban planning; urban landscape; environmental gradient   urban planning; bird richness; policy recommendations; habitat attributes; urbanization gradient | <b>change detection</b> (12.11); Lake Tahoe (8.39); remote sensing (6.76); urban ecology (6.5); urbanization gradient (6.04)                            | urbanization gradient; community composition; exotic plant species; landcover; montane forest structure      |
| #11 | <b>natural perception</b>             | urban green space; ecosystem service; visitor perception; naturalistic landscape design; outdoor recreation   compact city; amenity value; housing market; environmental benefits; urban natural area                                                                        | <b>perception</b> (11.36); china (10.05); Guangzhou (9.11); quality of life (7.66); understanding (5.67)                                                | understanding; park design; outdoor recreation; green network; urban natural area                            |
| #12 | urban ecology                         | urban ecology; garden boundaries; stable isotopes; green infrastructure; tree species richness   benthic index; landscape pattern; of biotic integrity; impervious surface; aquatic macroinvertebrates                                                                       | <b>urban ecology</b> (8.16); scaling (5.43); Australia (5.43); complex systems modeling (5.34); socioecosystem (5.34)                                   | complex systems modeling; socioecosystem; functional groups; benthic index of biotic integrity; institutions |
| #13 | restoration                           | urban ecology; ecosystem services; land remediation; soil formation; biotic integrity   soil quality; urban regeneration; land remediation; soil ecology; urban design                                                                                                       | <b>restoration</b> (7.17); biotic integrity (6.83); soil formation (6.83); biotic indices (6.83); soil ecology (6.83)                                   | biotic integrity; soil formation; biotic indices; soil ecology; green roof                                   |
| #14 | equity                                | environmental design; environmental psychology; public spaces; urban climate; climate planning   infrastructure systems; sustainable neighborhood design; urban forestry; city planning; public service engineering                                                          | <b>equity</b> (14.72); health (14.72); environment (9.28); energy (7.33); climate planning (7.33)                                                       | energy; climate planning; buildings; transport; environmental psychology                                     |
| #15 | regulationist approach                | reserve design; ecosystem processes; gis analysis; habitat conservation plans; urban interface   local knowledge; environmental health; community planning; urban interface; regulationist approach                                                                          | <b>regulationist approach</b> (9.58); governance (9.58); rescaling (9.58); urban regime theory (9.58); wildland/urban interface (9.58)                  | regulationist approach; governance; rescaling; urban regime theory; wildland/urban interface                 |
| #16 | forest                                | forest; habitats; urban; greenbelt; urban ecology   environmental design; sustainable development; conservation subdivision; forest; habitats                                                                                                                                | <b>forest</b> (6.28); environmental policy (6.28); open spaces (6.28); Israel (6.28); river corridors (6.28)                                            | urbanization gradient; habitat; biotic integrity; passer domesticus; urban spatial dynamics                  |
| #17 | <b>urban environmental transition</b> | globalization; functional city system; Asia-pacific; urban sustainability; urban environmental transition                                                                                                                                                                    | <b>urban environmental transition</b> (11.63); globalization (11.63); Asia-pacific (11.63); functional city system (11.63); urban sustainability (6.65) | urban ecology; urbanization; biodiversity; urban environmental transition; globalization                     |
| #19 | residential mobility                  | compact city policy; sustainable development; compact cities; residential preferences; residential mobility   residential mobility; sustainable development; compact cities; compact city policy; residential preferences                                                    | <b>residential mobility</b> (20.96); compact city policy (20.96); compact cities (10.36); neighborhood (10.36); residential preferences (10.36)         | residential mobility; compact city policy; compact cities; neighborhood; residential preferences             |
| #21 | ground survey                         | land cover; landscape; spatial scale; ground survey; remote sensing                                                                                                                                                                                                          | <b>ground survey</b> (11.63); spatial scale (8.87); remote sensing (7.15); land cover (5.92); landscape (5.4)                                           | urban ecology; urbanization; biodiversity; ground survey; spatial scale                                      |

The terms highlighted in bold indicate the labels for clusters derived from the initial annotations.

**Table S3.** Cluster Dependency Labels in the 2010s.

| Cluster-ID | Tags | Top Terms (Latent Semantic Analysis) | Top Terms (Log-Likelihood Ratio) | Top Terms (Mutual Information) |
|------------|------|--------------------------------------|----------------------------------|--------------------------------|
|------------|------|--------------------------------------|----------------------------------|--------------------------------|

|    |                      |                                                                                                                                                                                                                                                |                                                                                                                                                            |                                                                                                                              |
|----|----------------------|------------------------------------------------------------------------------------------------------------------------------------------------------------------------------------------------------------------------------------------------|------------------------------------------------------------------------------------------------------------------------------------------------------------|------------------------------------------------------------------------------------------------------------------------------|
| #0 | health               | green space; urban sustainability; regression analysis; psychological restoration; exposure assessment   urban planning; mental health; natural space; methodology refinement; exposure assessment                                             | <b>mental health</b> (61.49); physical activity (55.81); green space (54.37); health (36.67); greenness (30.68)                                            | blue health; ageing; allergy hazard; community values; attitudes                                                             |
| #1 | urban ecology        | urban ecology; urban environmental management; urban nature conservation; habitat connectivity; nitrogen management   ecosystem services; urban planning; biodiversity conservation; urban ecosystems; urban green space                       | <b>urban ecology</b> (54.99); stream restoration (23.92); urbanization (21.85); novel ecosystems (19.02); indicator species (17.93)                        | community composition; Acer negundo; greenhouses; home gardens; human-wildlife interactions                                  |
| #2 | ecosystem services   | ecosystem services; spatial planning; Delphi survey; strategic environmental assessment; environmental impact assessment   green infrastructure; social-ecological systems; health risk assessment; urban sustainability; planning strategies  | <b>ecosystem services</b> (13.88); built environment (13.29); walking (12.95); health promotion (11.05); Landsat (11.05)                                   | civic networks; conversion of land use and its effects (clue-s) model; built infrastructure; change analysis; city logistics |
| #3 | urban heat island    | urban heat island; urban green infrastructure; cool island; human comfort; urban heat mitigation   land surface temperature; landscape pattern; landscape metrics; Tianjin-Hebei urban agglomeration; interpretative ability                   | <b>urban heat island</b> (198.06); environment (89.84); thermal comfort (70.1); land surface temperature (68.95); microclimate (63.43)                     | environmental simulation; cooling intensity; blue-green cities; assessment approach; heat mitigation strategies              |
| #4 | ecosystem services   | ecosystem services; systemic solutions; rapid assessment; urban forestry; socio-environmental equity   green infrastructure; central Europe; cross-city approach; sustainable urban drainage systems; cost-benefit analysis                    | <b>ecosystem services</b> (61.43); urban ecosystem services (38.12); mapping (23.83); green infrastructure (22.52); urban planning (19.68)                 | earthworms; cantons; Colombo; agricultural land-use; Apulia                                                                  |
| #5 | green infrastructure | green infrastructure; urban greening practices; multi-disciplinary collaboration; urban green development; European biodiversity strategy   ecosystem services; urban ecology; landscape planning; multi-scale approach; participatory mapping | <b>green infrastructure</b> (68.75); sponge city (26.34); stormwater management (24.93); green stormwater infrastructure (24.88); urban resilience (24.55) | adaptation pathway; engineering infrastructure; environmental accounting; community greening; communities                    |
| #6 | smart city           | urban sustainability; environmental indicators; bibliometric analysis; tianjin eco-city kpi; geographical analysis   smart cities; smart governance; urban quality assessment; urban industrial symbiosis; circular economy                    | <b>smart city</b> (149.19); smart cities (71.56); eco-city (67.78); ecosystem services (46.49); smart sustainable cities (44.51)                           | computation architecture; cybernetics; context-aware computing; degrowth; climate change adaptation policies                 |
| #7 | climate change       | climate change; sustainable development; carbon economy; strategic planning; strategic thinking   urban metabolism; urban ecology; ecological network analysis; ecological hierarchy; greenhouse gases                                         | <b>climate change</b> (33.91); ecosystem services (25.64); green infrastructure (19.09); London (18.63); transport (18.63)                                 | cooperative; socio-technical transition theory; Rome; eco-economy; environmental risks                                       |
| #8 | urbanization         | ecosystem services; land use simulation; logistic-ca model; Wuhan urban agglomeration; human ecological demand   urban expansion; scenario analysis; shared socioeconomic pathways; chang bai mountain; cellular automata model                | <b>urbanization</b> (51.34); China (51.05); urban expansion (33.79); urban growth (30.84); green infrastructure (28.11)                                    | geographically and temporally weighted regression; CA-Markov model; dmsp/ols; centrality; land system design                 |
| #9 | green roof           | green roofs; surface energy balance; plant communities; experimental measurements; human exercise physiology   urban heat island; urban planning; green infrastructure; stormwater management; plant communities                               | <b>green roof</b> (53.88); green roofs (47.9); plant traits (26.61); green facades (19.95); vegetated roofs (19.95)                                        | climate-sensitive urban design; sustainable built environment; mixed-sewage-sludge substrate (msss); succession; flora       |

|     |                       |                                                                                                                                                                                                                                   |                                                                                                                                                             |                                                                                                                      |
|-----|-----------------------|-----------------------------------------------------------------------------------------------------------------------------------------------------------------------------------------------------------------------------------|-------------------------------------------------------------------------------------------------------------------------------------------------------------|----------------------------------------------------------------------------------------------------------------------|
| #10 | air quality           | green infrastructure; air pollution; leaf characteristics; traffic-based pollution; Miani Sahib   ecosystem services; urban green spaces; street trees; soil carbon content; pervious-imperious surfaces                          | <b>air quality</b> (48.25); particulate matter (31.76); air pollution (30.86); trees (23.45); urban air quality (23.45)                                     | economic stratification; lagrangian stochastic model; cfd; deposition velocity; foliage density                      |
| #11 | public perception     | ecosystem services; nature-based solutions; urban flooding; public perception; greenhouse gases   green infrastructure; cross-city approach; central Europe; questionnaire survey; human health                                   | <b>public perception</b> (18.47); urban atlas (17.51); provisioning ecosystem services (17.51); survey (13.13); biocultural diversity (12.77)               | Karachi; beliefs; endangered plant species; multi-criteria evaluation; e-governance                                  |
| #12 | urban biodiversity    | urban ecology; green infrastructure; conservation planning; urban parks; plant richness   urban planning; ecosystem services; green space; urban vegetation; climate adaptation                                                   | <b>urban biodiversity</b> (49.13); biodiversity (32.27); conservation (27.61); species richness (27.4); pollinators (26.83)                                 | accessibility of green spaces; cdv; ecosystem function; edge contrast; chloride)                                     |
| #13 | environmental justice | environmental justice; social-ecological systems; urban ecosystems; residential segregation; American free trade agreement   ecosystem services; cluster analysis; environmental inequality; social justice; spatial distribution | <b>environmental justice</b> (68.62); environmental gentrification (38.46); urbanization (18.92); vacant land (16.46); spatial accessibility (16.46)        | community bonding; accessibility indicator; business case; design practice; 2sfca improve model                      |
| #14 | residential landscape | ecosystem services; urban planning; urban development; small actions; print media   green infrastructure; climate change; urban design; urban forest; residential landscapes                                                      | <b>residential landscape</b> (12.09); urban area (12.09); residential landscapes (12.09); residential encroachment (12.09); urban densification (12.09)     | garden complex; modis enhanced vegetation index (evi); private urban forest; citizens benefits; private green spaces |
| #15 | urban metabolism      | urban metabolism; urban planning; energy consumption; water supply; water scarcity   industrial ecology; climate change; business models; technological transition; resource management                                           | <b>urban metabolism</b> (157.67); industrial ecology (66.42); ecological network analysis (32.46); green infrastructure (24.58); ecosystem services (23.69) | jing-jin-ji urban agglomeration; flexible devices; breeam communities; social ecology; megacity                      |
| #16 | land-use planning     | ecosystem services; urban biodiversity; ecological scales; adaptive governance; public perception   urban ecology; urban forest; health perception; environmental psychologists; nature perception                                | <b>land-use planning</b> (8.86); ecological planning (7.99); woodland birds (7.72); green system (7.72); urban open spaces (7.72)                           | woodland birds; green system; urban open spaces; dense city; open space index                                        |
| #17 | urban regeneration    | climate change; adaptive capacity; land use change; green infrastructure; urban climate resilience   urban regeneration; design methods; political mindfulness; inner transition; organizational mindfulness                      | <b>urban regeneration</b> (27.35); South Africa (15.79); local government (9.18); ecosystem services (8.22); inclusive governance (7.89)                    | inclusive governance; result; urban geoengineering; structures and design; mdantsane township                        |

The terms highlighted in bold indicate the labels for clusters derived from the initial annotations.

**Table S4.** Cluster Dependency Labels in the 2020–2023.

| Cluster-ID | Tags              | Top Terms (Latent Semantic Analysis)                                                                                                                                                                               | Top Terms (Log-Likelihood Ratio)                                                                                                                                             | Top Terms (Mutual Information)                                                                              |
|------------|-------------------|--------------------------------------------------------------------------------------------------------------------------------------------------------------------------------------------------------------------|------------------------------------------------------------------------------------------------------------------------------------------------------------------------------|-------------------------------------------------------------------------------------------------------------|
| #0         | health            | green space; ecosystem services; nature-based solutions; systematic review; ecosystem disservices   mental health; socio-environmental justice; green justice; fine-scale green space analysis; campus environment | <b>mental health</b> (119.51); green space (110.77); physical activity (50.83); health (46.82); public health (44.4)                                                         | 16 s ribosomal rna; 0; birch pollen allergy; blue health; birth cohort                                      |
| #1         | urban heat island | urban heat island; mitigation strategies; building energy consumption; research method; climatic comfort   land surface temperature; landscape metrics; cool island                                                | <b>urban heat island</b> (274.9); land surface temperature (265.11); cooling effect (73.51); surface urban cooling intensity; heat island (55.1); urban heat islands (44.06) | climatic comfort; building climate zone; urban cooling intensity; cemeteries; composition and configuration |

|     |                              |                                                                                                                                                                                                                                    |                                                                                                                                                            |                                                                                                                                |
|-----|------------------------------|------------------------------------------------------------------------------------------------------------------------------------------------------------------------------------------------------------------------------------|------------------------------------------------------------------------------------------------------------------------------------------------------------|--------------------------------------------------------------------------------------------------------------------------------|
|     |                              | effects; cooling gradient; urban green space planning                                                                                                                                                                              |                                                                                                                                                            |                                                                                                                                |
| #2  | sponge city                  | green infrastructure; climate justice; climate gentrification; adaptation planning; urban green areas   ecosystem services; urban planning; environmental justice; urban sustainability; sensitivity analysis                      | <b>sponge city</b> (151.38); green infrastructure (149.92); stormwater management (89.78); low impact development (72.53); stormwater (36.22)              | adaptation pathway; above-ground biomass; bibliometric method; boundary object; bird abundance                                 |
| #3  | ecosystem services           | ecosystem services; urban planning; green infrastructure; urban ecosystem services; systematic literature review   ecosystem service value; weighted regression; nansihu lake basin; urban sustainability; regression analysis     | <b>ecosystem services</b> (116.36); urbanization (78.97); ecosystem service value (69.43); ecosystem services value (47.42); driving factors (30.85)       | cvm; coastal zones; blue carbon; central Yunnan city cluster; coldspots                                                        |
| #4  | accessibility                | environmental justice; nature connection; urban growth machine; spatial differentiation; legal status   urban green space; green space justice; urban green space distribution; socioeconomic inequalities; human geography        | <b>accessibility</b> (97.86); environmental justice (78.98); urban green space (46.64); inequity (31.72); gini coefficient (30.09)                         | china social survey; accessibility analysis; 4?a? framework; built environments; children's geographies                        |
| #5  | urban expansion              | urban expansion; sample optimization; annual land cover mapping; spatio-temporal consistency modification; remote sensing data   ecosystem services; land use change; ecological protection redlines; urban vitality; watershed    | <b>plus model</b> (132.61); urban expansion (115.32); invest model (112.68); habitat quality (109.82); carbon storage (108.45)                             | 1; dem digital elevation model; chengdu-chongqing urban agglomeration (ccua); built land; dynamic land-use simulation          |
| #6  | nature-based solutions       | nature-based solutions; ecosystem services; green space; ecosystem disservices; systematic review   green infrastructure; climate change; natural risks; growing roofs; urban sustainability                                       | <b>nature-based solutions</b> (265.5); climate change adaptation (31.08); nature-based solutions (nbs) (27.66); nbs (25.84); urban governance (25.45)      | appropriation of nature; (eco)poverty; benefit transfer; agri-food supply chain; Atlantic rainforest                           |
| #7  | COVID-19                     | urban planning; air quality; socioeconomic factors; urban density; text analysis   ecosystem services; spatial assessment; green space quality; nature-based interventions; planetary health                                       | <b>COVID-19</b> (254.92); recreation (45.39); lockdown (33.55); pandemic (28.05); COVID-19 pandemic (27.95)                                                | ces; Ankara; COVID-19 mortality; correspondence analysis; capital                                                              |
| #8  | outdoor thermal comfort      | urban heat island; mitigation strategies; building energy consumption; research method; landscape metrics   outdoor thermal comfort; physiological equivalent temperature; urban green spaces; heat stress; physical activity      | <b>outdoor thermal comfort</b> (123.5); thermal comfort (116.72); envi-met (109.88); microclimate (96.08); urban heat island (77.86)                       | cooling impact; ecosystem function; foliage density; avenue trees; decision trees                                              |
| #9  | coupling coordination degree | urban agglomeration; ecological environment; Yangtze river delta; economic development; gray correlation   coupling coordination degree; water environment; temporal variation; vector autoregression; Wuhan urban agglomeration   | <b>coupling coordination degree</b> (112.86); ecosystem health (78.34); ecological environment (72.9); urbanization (58.88); new-type urbanization (49.03) | ccd; co2 emission; cloud computing; ccdc; geographical detector model                                                          |
| #10 | ecological security pattern  | ecological security pattern; ecological corridors; ecological source; landslide sensitivity assessment model; circuit theory model   circuit theory; ecological security; land use simulation; Taihu lake basin; ecological source | <b>ecological security pattern</b> (169.37); circuit theory (95.13); ecological network (89.66); ecological corridor (76.67); ecological source (57.95)    | ecological groups; pinch points; main agricultural production areas; landscape pattern evolution; important ecological regions |
| #11 | urban resilience             | urban resilience; ecosystem services; climate change adaptation; informal settlements; pacific sids   sustainable development; climate change; urban planning; compact city; urban density                                         | <b>urban resilience</b> (170.87); resilience (47.82); urban sustainability (20.67); Shenyang city (19.5); sustainability (19)                              | community governance; exposure-connectedness-potential (ecp); fuzzy set qca; critical obstacle; conflicting goals              |

|     |                                    |                                                                                                                                                                                                                                |                                                                                                                                                                                                |                                                                                                                                         |
|-----|------------------------------------|--------------------------------------------------------------------------------------------------------------------------------------------------------------------------------------------------------------------------------|------------------------------------------------------------------------------------------------------------------------------------------------------------------------------------------------|-----------------------------------------------------------------------------------------------------------------------------------------|
| #12 | urban biodiversity                 | ecosystem services; nature-based solutions; green space; ecosystem disservices; urban vegetation green infrastructure; urban planning; urban ecosystem services; systematic literature review; insect conservation             | <b>urban biodiversity</b> (151.84); biodiversity (96.75); urban ecology (53.44); landscape ecology (28.61); functional diversity (27.04)                                                       | biodiversity and design; biodiversity threats; bathymetry; advance regeneration; anthropogenic habitat                                  |
| #13 | production–living–ecological space | sustainable development; green innovation; green development; eco-industrial park; quasi-natural experiment living-ecological space; land use function; spatial optimization; land use modeling; text analysis                 | <b>production–living–ecological space</b> (48.2); production–living–ecological spaces (38.4); green total factor productivity (37.66); land use function (34.12); rural revitalization (34.12) | a; e-commerce pilot city policy; comprehensive innovation reform; island carrying capacity; fang county                                 |
| #14 | environmental justice              | environmental justice; urban planning; green space; European green capital; multiscalar governance green infrastructure; climate justice; adaptation planning; climate gentrification; territorial development                 | <b>environmental justice</b> (120.86); gentrification (96.5); green gentrification (80.53); climate justice (42.71); urban greening (29.23)                                                    | green -blue infrastructure; >; green public space quality; fantasy; environmental racism                                                |
| #15 | particulate matter                 | green infrastructure; urban greening; urban ecosystem services; urban forest management; environmental equity air pollution; large-eddy simulation; permeable surfaces; biogenic volatile organic compound; indoor air quality | <b>particulate matter</b> (94.1); air pollution (92.42); air quality (67.01); urban air quality (50.1); urban trees (32.31)                                                                    | 5; computational fluid dynamics (cf) model; community mobilization and stakeholder engagement; gaseous pollutants; effectiveness        |
| #16 | green roofs                        | green roofs; green infrastructure; public policies; policy incentives; limiting factors urban heat island; building energy consumption; research method; mitigation strategies; leaf stomatal resistance                       | <b>green roofs</b> (131.24); green roof (97.51); green walls (47.1); Mediterranean climate (26.43); vertical greening systems (26.43)                                                          | do-it-yourself; l; building-integrated vegetation; global review; community awareness                                                   |
| #17 | smart city                         | digital economy; coupling coordination; land conflict; land ecology; urban living labs smart cities; resilient cities; urban areas; smart resilient cities; indicators bank                                                    | <b>digital economy</b> (124.72); smart city (108.54); spatial spillover effect (42.93); smart cities (36.89); ecosystem services (27.43)                                                       | knowledge-based development; ridesharing; national big data comprehensive pilot zone; green and high-quality development; digital twins |

The terms highlighted in bold indicate the labels for clusters derived from the initial annotations.
