# Supplementary material
Source: MDPI journal article supplement (https://www.mdpi.com/2071-1050/15/24/16854)
Supplement: s1 [file s1]

## Supplementary Materials File S1

### Search Term

TS=sustainable city planning OR TS=ecologically sustainable urban design OR TS=sustainable urban ecology OR TS=sustainable urban infrastructure OR TS=urban ecological design OR TS=eco-friendly urban development OR TS=green city design OR TS=ecological urbanism OR TS=biophilic urban design OR TS=nature-based urban planning OR TS=resilient urban design OR TS=eco-urban development OR TS=biodiverse city planning OR TS=urban green space design OR TS=ecological regeneration in cities OR TS=urban environmental planning OR TS=ecological resilience in cities OR TS=eco-urbanism OR TS=urban ecosystem restoration OR TS=green urban

### Data Cleaning and Management

Refined By: (Document Types: Article or Review Article) and (Languages: English) and [exclude] Web of Science Categories: (Cardiac Cardiovascular Systems or Cell Biology or Geochemistry Geophysics or Parasitology or Engineering Multidisciplinary or Chemistry Multidisciplinary or Immunology or Pediatrics or Respiratory System or Nursing or Education Educational Research or Physics Applied or Obstetrics Gynecology or Oceanography or Gastroenterology Hepatology or Rehabilitation or Agriculture Dairy Animal Science or Zoology or Psychology Clinical or Radiology Nuclear Medicine Medical Imaging or Surgery or Genetics Heredity or Engineering Geological or Veterinary Sciences or Evolutionary Biology or Geriatrics Gerontology or Water Resources or Medicine Research Experimental or Anthropology or Mechanics or Oncology or Tropical Medicine or Neurosciences or Ophthalmology or Microbiology or Entomology or Marine Freshwater Biology or Food Science Technology or Clinical Neurology or Biochemistry Molecular Biology or Pharmacology Pharmacy or Biotechnology Applied Microbiology or Mathematics Applied or Mathematics or Mathematical Computational Biology or Mathematics Interdisciplinary Applications or Engineering Electrical Electronic or Materials Science Biomaterials or Agriculture Multidisciplinary or Engineering Mechanical or Nutrition Dietetics or Management or Agronomy or Social Work or Urology Nephrology or Women S Studies or Engineering Biomedical or Ornithology or Information Science Library Science or Infectious Diseases or Astronomy Astrophysics or Dentistry Oral Surgery Medicine or Engineering Petroleum or Imaging Science Photographic Technology or Engineering Aerospace or Family Studies or Emergency Medicine or Chemistry Analytical or Communication or Religion or Orthopedics or Paleontology or Electrochemistry or Physics Mathematical or Chemistry Medicinal or Rheumatology or Instruments Instrumentation or Dermatology or Political Science or Public Administration or Computer Science Information Systems or Ethnic Studies or Business or History Philosophy Of Science or Medical Ethics or Operations Research Management Science or Psychology Educational or Geology or Computer Science Software Engineering or Mycology or Chemistry Applied or Computer Science Artificial Intelligence or Industrial Relations Labor or Social Sciences Mathematical Methods or Audiology Speech Language Pathology or Criminology Penology or Cultural Studies or Engineering Ocean or Humanities Multidisciplinary or Limnology or Materials Science Characterization Testing or Materials Science Composites or Reproductive Biology or Business Finance or Spectroscopy or Physics Fluids Plasmas or Peripheral Vascular Disease or Mineralogy or Medicine Legal or Medical Laboratory Technology or Literature Romance or Literature German Dutch Scandinavian or Literature British Isles or Film Radio Television or Developmental Biology or Chemistry Inorganic Nuclear or Music or Virology or Medieval Renaissance Studies or Materials Science Ceramics or Literary Theory Criticism or Integrative Complementary Medicine or Folklore or Engineering Manufacturing or Dance or Critical Care Medicine or Polymer Science or Linguistics or Allergy or Materials Science Textiles or Theater or Statistics Probability or Language Linguistics or Physics Atomic Molecular Chemical or Computer Science Hardware Architecture or Engineering Marine or Psychology or Philosophy or Nanoscience Nanotechnology or Medical Informatics or Optics or Nuclear Science Technology)

**Timespan:** 1900–16 October 2023

SCI-EXPANDED, SSCI, CPCI-S, CPCI-SSH, CCR-EXPANDED, IC.
