# Supplementary material
Source: MDPI journal article supplement (https://www.mdpi.com/2071-1050/15/24/16854)
Supplement: s1 [file s1]

## Supplementary Materials File S2

**Table S1.** Co-cited Cluster Labels.

| Cluster-ID | Tags                   | Top Terms (Latent Semantic Analysis)                                                                                                                                                                                                                                                                                                                                                                                                                | Top Terms (Log-Likelihood Ratio)                                                                                                                            | Top Terms (Mutual Information)                                                                                                       |
|------------|------------------------|-----------------------------------------------------------------------------------------------------------------------------------------------------------------------------------------------------------------------------------------------------------------------------------------------------------------------------------------------------------------------------------------------------------------------------------------------------|-------------------------------------------------------------------------------------------------------------------------------------------------------------|--------------------------------------------------------------------------------------------------------------------------------------|
| #0         | urban expansion        | ecosystem services; land use simulation; logistic-ca model; ecosystem services modeling; interaction effects   urban agglomeration; ecological environment; Yangtze river delta; economic development; gray correlation                                                                                                                                                                                                                             | <b>urban expansion</b> (152.08); ecological security pattern (142.25); habitat quality (128.87); invest model (127.49); plus model (111.56)                 | jing-jin-ji urban agglomeration; Chengdu world modern garden city; human exercise physiology; biotic integrity; civic networks       |
| #1         | housing density        | urban ecology; land cover change; multinomial logit; urban development; land cover modeling   ecosystem services; land-use planning; urban region; urban green areas; target species                                                                                                                                                                                                                                                                | <b>housing density</b> (34.45); urban ecology (31.38); rural residential development (27.55); wildland-urban interface (27.55); exurban (20.66)             | community composition; Acer negundo; correlation; favorite place prescriptions; balance of carbon-oxygen                             |
| #2         | COVID-19               | green space; urban blue-green space; health geographies; urban fabric; inclusive urban planning   urban planning; urban green spaces; climate change mitigation; multidisciplinary approach; stakeholder engagement                                                                                                                                                                                                                                 | <b>COVID-19</b> (160.46); mental health (137.49); accessibility (114.88); green space (112.99); environmental justice (70.63)                               | jing-jin-ji urban agglomeration; Chengdu world modern garden city; human exercise physiology; biotic integrity; civic networks       |
| #3         | urban heat island      | urban heat island; mitigation strategies; building energy consumption; research method; in-situ measurement   land surface temperature; cooling effect; urban parks; natural cooling strategies; accessibility evaluation                                                                                                                                                                                                                           | <b>urban heat island</b> (541.14); land surface temperature (261.65); environment (215.61); thermal comfort (173.33); cooling effect (145.66)               | jing-jin-ji urban agglomeration ; Chengdu world modern garden city; human exercise physiology; biotic integrity; civic networks      |
| #4         | ecosystem services     | ecosystem services; land use simulation; logistic-ca model; practice theory; flood regulation   green infrastructure; green space; urban wilderness; interdisciplinary design; human ecological demand                                                                                                                                                                                                                                              | <b>ecosystem services</b> (98.93); social-ecological systems (61.51); urban ecosystem services (54.26); cultural ecosystem services (53.25); mapping (37.1) | jing-jin-ji urban agglomeration; Chengdu world modern garden city; human exercise physiology; biotic integrity; civic networks       |
| #5         | nature-based solutions | nature-based solutions; ecosystem services; green space; systematic review; ecosystem disservices   green infrastructure; climate change; provisioning services; urban sustainability; sensitivity analysis                                                                                                                                                                                                                                         | <b>nature-based solutions</b> (305.46); green infrastructure (139); sponge city (125.73); stormwater management (61.77); environmental justice (53.64)      | jing-jin-ji urban agglomeration; Chengdu world modern garden city; human exercise physiology; biotic integrity; civic networks       |
| #6         | urban ecology          | urban ecology; green infrastructure; urban gradient; urban forestry; nature perception   ecosystem services; urban regions; spatial data infrastructures; Wuhan urban agglomeration; nitrogen management ecosystem services; spatial planning; Delphi survey; strategic environmental assessment; environmental impact assessment   green infrastructure; social-ecological systems; land use history; health risk assessment; urban sustainability | <b>urban ecology</b> (49.36); stream restoration (31.31); emergy synthesis (25.04); nature-based solutions (23.22); resilience (21.19)                      | biotic integrity; cooperative; aquatic invertebrates; designer ecosystems; competitiveness                                           |
| #7         | physical activity      | ecosystem services; green space; nature-based solutions; urban vegetation; ecosystem disservices   urban ecology; ecological restoration; invasive species; new york city; vegetation dynamics                                                                                                                                                                                                                                                      | <b>walking</b> (25.62); nature-based solutions (21.56); built environment (19.94); overweight (19.21); physical activity (18.08)                            | civic networks; economic stratification; enabling place; conversion of land use and its effects (clue-s) model; built infrastructure |
| #8         | urban biodiversity     |                                                                                                                                                                                                                                                                                                                                                                                                                                                     | <b>urban biodiversity</b> (105.36); biodiversity (100.42); species richness (49.41); urban ecology (46.7); pollinators (41.84)                              | jing-jin-ji urban agglomeration; Chengdu world modern garden city; human exercise                                                    |

|     |                              |                                                                                                                                                                                                                                            |                                                                                                                                                               |                                                                                                                              |
|-----|------------------------------|--------------------------------------------------------------------------------------------------------------------------------------------------------------------------------------------------------------------------------------------|---------------------------------------------------------------------------------------------------------------------------------------------------------------|------------------------------------------------------------------------------------------------------------------------------|
|     |                              |                                                                                                                                                                                                                                            |                                                                                                                                                               | physiology; biotic integrity; civic networks                                                                                 |
|     |                              |                                                                                                                                                                                                                                            |                                                                                                                                                               | Xiamen island; ecosystem function; green network; complex systems modeling; disturbance sensitivity                          |
| #9  | urban tree                   | urban planning; sustainable development; urban ecosystem; urban hydrology; environmental targets   urban ecology; landscape ecology; land-use patterns; ecosystem function; ecological condition                                           | <b>urban tree</b> (23.46); green infrastructure (23.4); birds (21.83); landscape (18.38); riparian forest (15.63)                                             |                                                                                                                              |
| #10 | smart city                   | smart cities; sustainable cities; social justice; sustainable communities; environmental justice   urban resilience; Shenyang city; spatial-temporal characteristics; adaptive cycle; integrated urban planning                            | <b>smart city</b> (292.83); smart cities (128.87); eco-city (93.08); ecosystem services (70.24; urban resilience (68.14)                                      | biophilic cities; causes and effects; business incubation; Addis Ababa; behavioral change                                    |
| #11 | green roof                   | green roofs; surface energy balance; plant communities; human exercise physiology; experimental measurements   green infrastructure; urban heat island; human thermal comfort; plant communities; human exercise physiology                | <b>green roof</b> (51.41); green roofs (39.37); plant traits (22.92); living roof (22.84); ecological wisdom (22.84)                                          | Chengdu World Modern Garden City; human exercise physiology; estuaries; sustainable built environment; sound propagation     |
| #12 | air pollution                | green infrastructure; traffic emission; nanoparticle dispersion; permeable surfaces; biogenic volatile organic compound   air pollution; large-eddy simulation; permeable surfaces; biogenic volatile organic compound; indoor air quality | <b>particulate matter</b> (136.62); air pollution (130.04); air quality (91.66); urban air quality (87.64); deposition (31.25)                                | capitalization of urban green; 5; air pollution regulation; case study application; computational fluid dynamics (cfd) model |
| #13 | public lands                 | alternative futures; stream flows; water rights; in-stream water rights; basin-level water-resource planning   spatial scale; species extinction; species invasion; floral homogenization; conservation planning                           | <b>public lands</b> (21.29); alternative futures (17.48); ruderals (10.63); amenity migration (10.63); North Carolina (10.63)                                 | ecosystem services; green infrastructure; ruderals; amenity migration; North Carolina                                        |
| #14 | residential mobility         | sustainable development; regional planning; greenhouse gases; urban heat island; landscape pattern   residential mobility; compact city policy; greenhouse gases; urban heat island; landscape pattern                                     | <b>residential mobility</b> (27.24); compact city policy (27.24); Vancouver (18.15); building assessment system (18.15); political ecology (16.76)            | place-based learning; subjectivity ; active citizenship; socionatures ; participatory planning                               |
| #15 | urban metabolism             | urban metabolism; urban ecology; ecological network analysis; material flow analysis; strong sustainability   industrial ecology; decision making; strong sustainability; urban planning system; parcel-scale analysis                     | <b>urban metabolism</b> (197.27); industrial ecology (73.56); ecological network analysis (46.57); ecosystem services (27.53); green infrastructure (24.18)   | jing-jin-ji urban agglomeration; impact assessment; leakage effect ; triple bottom line; urban mining                        |
| #16 | green innovation             | digital economy; spatial spillover effect; energy efficiency; nonlinear effect; multi-period two-stage dea model   green innovation; quasi-natural experiment; sustainable development; green development; eco-industrial park             | <b>digital economy</b> (151.83); green innovation (98.47); green total factor productivity (60.5); spatial spillover effect (52.92); carbon emissions (41.65) | policy effects; green and high-quality development; mediating effect analysis; temporal-spatial evolution; gpg               |
| #19 | urban environmental problems | sustainable development; urban environmental problems; post-socialist cities; ecological footprint; Czech republic   ecological footprint; urban design; green buildings; green building challenge; post-socialist cities                  | <b>urban environmental problems</b> (13.87); policies (13.87); post-socialist cities (13.87); tourism (13.87); Prague (13.87)                                 | ecosystem services; green infrastructure; urban planning; urbanization; nature-based solutions                               |
| #24 | community planning           | local knowledge; environmental health; community planning                                                                                                                                                                                  | <b>local knowledge</b> (17.78); community planning (17.78); environmental health (12.04); ecosystem services (0.22); green infrastructure (0.19)              | ecosystem services; green infrastructure; urban planning; urbanization; nature-based solutions                               |
| #25 | conservation planning        | conservation planning; future land use changes; biological invasions; spatial                                                                                                                                                              | <b>conservation planning</b> (16.23); vulnerability (14.06); reserve                                                                                          | ecosystem services; green infrastructure; urban                                                                              |

|     |                                       |                                                                                                                                                                                |                                                                                                                                               |                                                                                                |
|-----|---------------------------------------|--------------------------------------------------------------------------------------------------------------------------------------------------------------------------------|-----------------------------------------------------------------------------------------------------------------------------------------------|------------------------------------------------------------------------------------------------|
|     |                                       | modeling; exploratory data analysis   reserve selection (13.46); threats (13.46); selection; site ranking; species composition; anthropogenic factors; future land use changes | spatial logistic regression (13.46)                                                                                                           | planning; urbanization; nature-based solutions                                                 |
| #33 | simulation modeling                   | ecology; environmental assessment; planning; simulation modeling; sustainability; sustainability indicators; tools; united states; urban development                           | <b>simulation modeling</b> (15.32); United States (15.32); tools (15.32); sustainability indicators (10.83); environmental assessment (10.32) | ecosystem services; green infrastructure; urban planning; urbanization; nature-based solutions |
| #35 | <b>Canada sustainable development</b> | sustainable development; urban sustainability; william james; urban policy; urban planning   ideology; sustainability; regulation; legitimacy; injustice                       | <b>Canada</b> (22.06); injustice (12.9); uncelebrated communities (12.9); pragmatism (12.9); world urban forum (12.9)                         | ecosystem services; green infrastructure; urban planning; urbanization; nature-based solutions |

---

The terms highlighted in bold indicate the labels for clusters derived from the initial annotations.
