# Supplementary material
Source: MDPI journal article supplement (https://www.mdpi.com/2071-1050/15/24/16854)
Supplement: s1 [file s1]

Archive with 3 entries (3 files):
- sustainability-2737530-Supplementary Materials File S1.pdf
- sustainability-2737530-Supplementary Materials File S2.pdf
- sustainability-2737530-Supplementary Materials File S3.pdf
